# Supplementary material for: Serum metabolomic alterations in multiple myeloma revealed by targeted and untargeted metabolomics approaches: a pilot study
Source: Royal Society of Chemistry journal article supplement (doi:10.1039/c9ra04458b), 2019-01-01
Supplement: c9ra04458b2.pdf [file c9ra04458b2.pdf]

**Table S1.** Demographics and pathological features of MM samples.

| <b>S. No</b> | <b>Parameters</b>             | <b>Control (n=24)</b> | <b>MM (n=24)</b> | <b>p-value</b> |
|--------------|-------------------------------|-----------------------|------------------|----------------|
| 1            | Age                           | 56.6±18.75            | 62.75±18.6       | NS             |
| 2            | WBC ( $\times 10^9/L$ )       | 8.3±1.6               | 4.8±1.3          | <0.05          |
| 3            | Hemoglobin (g/L)              | 13.5±2.5              | 7.2±1.8          | <0.05          |
| 4            | Platelets ( $\times 10^9/L$ ) | 318±40.7              | 198±62.5         | <0.05          |
| 5            | MM clonal plasma cells (%)    | NA                    | 60±25            | ---            |
| 6            | Serum creatinine (mg/dL)      | 0.76±0.13             | 3.4±1.4          | <0.05          |
| 7            | M protein (g/dL)              | NA                    | 4.2±1.2          | ---            |

\*NA - Not Available

\*NS - Not Significant

**Table S2:** Retention time and matching score information of the metabolites identified using untargeted GC-MS approach as per MSI guidelines.

| <b>Sr. No.</b> | <b>Metabolite</b>                | <b>Retention Time</b> | <b>Match Score (%)</b> |
|----------------|----------------------------------|-----------------------|------------------------|
| 1              | D-Ribo-Hexitol                   | 25.32                 | 82.4                   |
| 2              | Beta-D-Glucopyranosiduronic acid | 24.92                 | 88.6                   |
| 3              | Hexadecanoic acid                | 28.26                 | 96.8                   |
| 4              | 1,5-Anhydro-D-sorbitol           | 24.38                 | 92.0                   |
| 5              | Pseudo uridine                   | 33.88                 | 84.6                   |
| 6              | D-Talofuranose                   | 25.08                 | 94.5                   |
| 7              | Glucofuranoside                  | 23.79                 | 91.3                   |
| 8              | N-Acetyl glucosamine             | 25.28                 | 97.2                   |
| 9              | Purine                           | 24.05                 | 87.8                   |
| 10             | Beta-D-Galactopyranoside         | 36.64                 | 93.1                   |
| 11             | Pyrimidine                       | 14.56                 | 85.3                   |
| 12             | 2-Piperidinecarboxylic acid      | 12.96                 | 83.8                   |
| 13             | D-Lactose                        | 28.64                 | 96.5                   |
| 14             | D-Xylofuranose                   | 23.53                 | 81.3                   |
| 15             | L-threonine                      | 14.20                 | 98.6                   |
| 16             | Nonadecanoic acid                | 33.38                 | 92.4                   |
| 17             | L-Threitol                       | 17.22                 | 89.6                   |
| 18             | D-Glucopyranose                  | 38.78                 | 94.3                   |
| 19             | 2-alpha-Mannobiose               | 42.40                 | 81.8                   |
| 20             | Cystathionine                    | 12.05                 | 83.8                   |
| 21             | Stearate                         | 29.72                 | 96.7                   |
| 22             | Inositol                         | 28.53                 | 95.2                   |
| 23             | L-Asparagine                     | 20.91                 | 97.1                   |
| 24             | Arachidonic acid                 | 33.76                 | 82.6                   |
| 25             | Beta-D-Galactofuranose           | 41.70                 | 86.4                   |
| 26             | D-Xylopyranose                   | 24.44                 | 84.9                   |
| 27             | Stigmasterol                     | 46.52                 | 96.6                   |
| 28             | Maltitol                         | 42.81                 | 90.8                   |

**Table S3.** Pathway analysis results showing potential pathways involved in MM.

| <b>Sr. No.</b> | <b>Pathway</b>                              | <b>Total</b> | <b>Hits</b> | <b>Raw <i>p</i>-value</b> | <b>FDR corrected <i>p</i>-value</b> | <b>Impact</b> |
|----------------|---------------------------------------------|--------------|-------------|---------------------------|-------------------------------------|---------------|
| 1              | Pyrimidine metabolism                       | 60           | 6           | 0.00032                   | 0.012813                            | 0.18984       |
| 2              | Alanine, aspartate and glutamate metabolism | 24           | 4           | 0.000496                  | 0.01322                             | 0.25831       |
| 3              | Glycine, serine and threonine metabolism    | 48           | 4           | 0.006863                  | 0.13725                             | 0.16843       |
| 4              | Cysteine and methionine metabolism          | 56           | 4           | 0.011805                  | 0.18888                             | 0.32131       |
| 5              | Purine metabolism                           | 92           | 5           | 0.015056                  | 0.20074                             | 0.02284       |
| 6              | Nitrogen metabolism                         | 39           | 3           | 0.024038                  | 0.27472                             | 0.00763       |
| 7              | Sulfur metabolism                           | 18           | 2           | 0.033241                  | 0.33241                             | 0.07087       |
| 8              | Citrate cycle (TCA cycle)                   | 20           | 2           | 0.040451                  | 0.35407                             | 0.14591       |
| 9              | Riboflavin metabolism                       | 21           | 2           | 0.044259                  | 0.35407                             | 0.14504       |
| 10             | Pentose and glucuronate interconversions    | 53           | 3           | 0.052779                  | 0.38385                             | 0.05588       |

**Table S4:** List of metabolome associated genes identified using Kyoto Encyclopedia of Genes and Genomes (KEGG) and human metabolic data base (HMDB).

|         |          |              |          |        |          |         |          |         |         |          |           |
|---------|----------|--------------|----------|--------|----------|---------|----------|---------|---------|----------|-----------|
| ZNRD1   | SLC7A7   | PUS10        | PLA2G4C  | PCYOX1 | NME4     | MTHFR   | IDH3B    | ENTPD8  | CYP2A7  | ASL      | ADORA2B   |
| ZNF638  | SLC7A6   | PUS1         | PLA2G4B  | PCK2   | NME3     | MTHFD2L | IDH3A    | ENTPD3  | CYP2A6  | ASAH2C   | ADORA2A   |
| ZCCHC6  | SLC7A1   | PUF60        | PLA2G4A  | PCK1   | NME2     | MTHFD2  | HSD3B7   | ENTPD1  | CYP2A13 | ASAH2    | ADORA1    |
| ZCCHC11 | SLC52A1  | PTGS2        | PLA2G3   | PC     | NME1     | MTHFD1  | HSD3B2   | ENPP3   | CYP1B1  | ASAH1    | ADK       |
| XDH     | SLC3A2   | PTGS1        | PLA2G2F  | PARP9  | NIT2     | MTAP    | HSD3B1   | ENPP1   | CYP1A2  | AS3MT    | ADH7      |
| UXS1    | SLC38A3  | PTGR2        | PLA2G2E  | PARP8  | NFS1     | MSRB3   | HSD17B8  | ENOX2   | CYP1A1  | ART5     | ADH6      |
| UROCI   | SLC35B3  | PTGR1        | PLA2G2D  | PARP6  | NDUFV2   | MSRB2   | HSD17B7  | ENOX1   | CYP19A1 | ART4     | ACOT2     |
| UPRT    | SLC35B2  | PRODH        | PLA2G2A  | PARP4  | NDUFV1   | MSRB1   | HSD17B6  | EHHADH  | CYB5RL  | ART3     | ACOT1     |
| UPP2    | SLC29A3  | PPCS         | PLA2G1B  | PARP3  | NDUFS8   | MSRA    | HSD17B4  | EGLN3   | CYB5R4  | ART1     | ACLY      |
| UPP1    | SLC29A2  | PPAT         | PLA2G16  | PARP2  | NDUFS7   | MSMO1   | HSD17B2  | EGLN2   | CYB5R3  | ARG2     | ACER2     |
| UGP2    | SLC27A6  | PPARG        | PLA2G12B | PARP16 | NDUFS6   | MOCOS   | HSD17B14 | EGLN1   | CYB5R2  | ARG1     | ACER1     |
| UGDH    | SLC27A4  | ppar gamma 2 | PLA2G12A | PARP15 | NDUFS5   | MINA    | HSD17B12 | DYR     | CYB5R1  | APRT     | ACADS     |
| UCKL1   | SLC27A3  | POLRMT       | PLA2G10  | PARP14 | NDUFS4   | MGMT    | HSD17B11 | DUOX2   | CTPS2   | APOBEC3H | AASS      |
| UCK2    | SLC27A1  | POLR3K       | PKM      | PARP12 | NDUFS3   | METAP2  | HSD17B10 | DUOX1   | CTPS1   | APOBEC3F | AASDH PPT |
| UCK1    | SLC25A10 | POLR3H       | PKLR     | PARP11 | NDUFS2   | ME3     | HSD17B1  | DPYD    | CTH     | APOBEC3D | AASDH     |
| UAP1L1  | SLC25A1  | POLR3GL      | PIPOX    | PARP10 | NDUFS1   | ME2     | HSD11B2  | DLD     | CTBP1   | APOBEC3C | A1CF      |
| UAP1    | SLC22A6  | POLR3G       | PIG59    | PARP1  | NDUFC2   | ME1     | HSD11B1  | DLAT    | CSAD    | APOBEC3B |           |
| TYR     | SLC1A5   | POLR3F       | PHYH     | PADI6  | NDUFB9   | MDH2    | HPRT1    | DKFZp   | CS      | APOBEC3A |           |
| TYMP    | SLC1A4   | POLR3E       | PHPT1    | PADI4  | NDUFB7   | MDH1    | HPGD     | DKC1    | CRYL1   | AOX1     |           |
| TWISTNB | SLC19A3  | POLR3D       | PHGDH    | PADI3  | NDUFB5   | MBD2    | HIPK1    | DIO3    | CPT1B   | ANPEP    |           |
| TUT1    | SLC16A10 | POLR3C       | PHF8     | PADI2  | NDUFB4   | MBD1    | HIF1AN   | DIO2    | CLC     | AMT      |           |
| TTR     | SLC13A3  | POLR3B       | PFKP     | PADI1  | NDUFB3   | MAT2B   | HIBADH   | DIO1    | CES5A   | ALOX5    |           |
| TRPT1   | SLC13A2  | POLR3A       | PFKM     | P4HTM  | NDUFB2   | MAT2A   | HADHA    | DHPS    | CES3    | ALOX15B  |           |
| TRPM2   | SLC13A1  | POLR2L       | PFKL     | P4HA3  | NDUFB11  | MAT1A   | HADH     | DHFR L1 | CES2    | ALOX15   |           |
| TPO     | SIRT7    | POLR2K       | PFAS     | P4HA2  | NDUFB1   | MARS2   | H6PD     | DHFR    | CES1    | ALOX12B  |           |
| TNKS2   | SIRT6    | POLR2J2      | PET112   | P4HA1  | NDUFA B1 | MARS    | GSS      | DHCR7   | CEL F2  | ALOX12   |           |
| TNKS    | SIRT5    | POLR2J       | PECR     | OXER1  | NDUFA9   | MAOA    | GSR      | DHCR24  | CEL     | ALKBH2   |           |
| TMLHE   | SIRT4    | POLR2I       | PDHB     | OXCT2  | NDUFA8   | LPL     | GRHPR    | DDOST   | CECR1   | ALKBH1   |           |
| TIPARP  | SIRT3    | POLR2H       | PDHA2    | OXCT1  | NDUFA7   | LIPG    | GPR17    | DDO     | CDO-1   | ALDH9A1  |           |
| THNSL1  | SIRT2    | POLR2G       | PDHA1    | OTC    | NDUFA6   | LIPF    | GPD1L    | DDB2    | CDO1    | ALDH8A1  |           |
| TGM7    | SIRT1    | POLR2F       | ADH5     | OLAH   | NDUFA5   | LIPE    | GPD1     | DDB1    | CDA     | ALDH7A1  |           |
| TGM6    | SERPINA7 | POLR2E       | ADH4     | OGDHL  | NDUFA4L2 | LIPC    | GOT2     | DDAH2   | CD38    | ALDH6A1  |           |

|             |             |              |       |            |             |             |             |             |            |             |  |
|-------------|-------------|--------------|-------|------------|-------------|-------------|-------------|-------------|------------|-------------|--|
| TGM5        | SDSL        | POLR2<br>D   | ADH1C | OGDH       | NDUFA<br>4  | LIAS        | GOT1L<br>1  | DDAH<br>1   | CCBL<br>2  | ALDH5<br>A1 |  |
| TGM4        | SDS         | POLR2<br>C   | ADH1B | NXN        | NDUFA<br>3  | LGALS<br>13 | GOT1        | DCXR        | CCBL<br>1  | ALDH4<br>A1 |  |
| TGM3        | SDR16<br>C5 | POLR2<br>B   | ADH1A | NUDT<br>7  | NDUFA<br>2  | LEPRE<br>L2 | GENE        | DCK         | CBS        | ALDH3B<br>2 |  |
| TGM2        | SDHD        | POLR2<br>A   | ADFP  | NUDT<br>2  | NDUFA<br>13 | LEPRE<br>L1 | GMPS        | DAD1        | CARS<br>2  | ALDH3B<br>1 |  |
| TGM1        | SDHC        | POLR1<br>E   | ADCY9 | NUDT<br>12 | NDUFA<br>12 | LEPRE<br>1  | GMDS        | CYP4Z<br>1  | CARS       | ALDH3<br>A2 |  |
| TGDS        | SDHB        | POLR1<br>D   | ADCY8 | NT5M       | NDUFA<br>11 | LDHC        | GLYAT<br>L1 | CYP4X<br>1  | CARN<br>S1 | ALDH3<br>A1 |  |
| TET3        | SDHA        | POLR1<br>C   | ADCY7 | NT5E       | NDUFA<br>10 | LDHB        | GLUL        | CYP4F<br>8  | CANT<br>1  | ALDH2       |  |
| TET2        | SCCPD<br>H  | POLR1<br>B   | ADCY6 | NT5C3      | NDUFA<br>1  | LDHAL<br>6B | GLUD2       | CYP4F<br>3  | CAD        | ALDH1B<br>1 |  |
| TET1        | SC5DL       | POLR1<br>A   | ADCY5 | NT5C2      | NARS2       | LDHAL<br>6A | GLUD1       | CYP4F<br>22 | C5orf4     | ALDH1<br>A3 |  |
| TAT         | RPN2        | PNPLA<br>8   | ADCY4 | NT5C1<br>B | NARS        | LDHA        | GLS2        | CYP4F<br>2  | BST1       | ALDH1<br>A2 |  |
| TARSL<br>2  | RPN1        | PNPLA<br>6   | ADCY3 | NT5C1<br>A | NAPRT<br>1  | LCMT2       | GLS         | CYP4F<br>11 | BLVR<br>B  | ALDH1<br>A1 |  |
| TARS2       | RFK         | PNPLA<br>4   | ADCY2 | NT5C       | NAMPT       | LCMT1       | GGCT        | CYP4B<br>1  | BLVR<br>A  | AKR1E2      |  |
| TARS        | RETSAT      | PNPLA<br>3   | ADCY1 | NSDHL      | NADSY<br>N1 | LARS2       | GFPT2       | CYP4A<br>22 | BHMT<br>2  | AKR1C4      |  |
| SULT6<br>B1 | RDH5        | PNPLA<br>2   | ADC   | NQO2       | NADKD<br>1  | LARS        | GFPT1       | CYP4A<br>11 | BHMT       | AKR1C3      |  |
| SUCLG<br>2  | RDH16       | PNP          | ADA   | NQO1       | NADK        | LAP3        | GCSH        | CYP3A<br>7  | BDH2       | AKR1C2      |  |
| SUCLG<br>1  | RARS2       | PNLIP<br>RP3 | ACYP2 | NOS3       | MTRR        | KYNU        | GCLM        | CYP3A<br>5  | BDH1       | AKR1C1      |  |
| SUCLA<br>2  | RARS        | PNLIP<br>RP2 | ACYP1 | NOS2       | MTR         | KMO         | GCLC        | CYP3A<br>43 | BCHE       | AKR1B1<br>0 |  |
| STT3B       | QRSL1       | PNLIP<br>RP1 | ACY3  | NOS1       | MT-<br>ND6  | KDM8        | GATM        | CYP3A<br>4  | BCAT<br>2  | AKR1B1      |  |
| STT3A       | QPRT        | PNLIP        | ACY1  | NO66       | MT-<br>ND5  | KDM2B       | GATC        | CYP2S<br>1  | BCAT<br>1  | AKR1A1      |  |
| STEAP<br>4  | QPCT        | PLOD3        | ACPT  | NNT        | MT-<br>ND4L | KDM2A       | GAPD<br>HS  | CYP2J<br>2  | BBOX<br>1  | AK3         |  |
| STEAP<br>3  | QDPR        | PLOD2        | ACPP  | NMRK<br>2  | MT-<br>ND4  | ITPA        | GAPD<br>H   | CYP2F<br>1  | BAAT       | AID         |  |
| STEAP<br>2  | QARS        | PLOD1        | ACP6  | NMRK<br>1  | MT-<br>ND3  | ISYNA1      | GALE        | CYP2E<br>1  | ASS1       | AICDA       |  |
| STEAP<br>1  | PYGL        | PLB1         | ACP5  | NMNA<br>T3 | MT-<br>ND2  | INMT        | FOXO4       | CYP2D<br>6  | ASRG<br>L1 | AHCYL<br>2  |  |
| SORD        | PYCRL       | PLA2G<br>6   | ACP2  | NMNA<br>T2 | MT-<br>ND1  | IMPDH<br>2  | FDFT1       | CYP2C<br>9  | ASPH       | AHCYL<br>1  |  |
| SLCO2<br>A1 | PYCR2       | PLA2G<br>5   | ACP1  | NMNA<br>T1 | MTMR7       | IMPDH<br>1  | FASN        | CYP2C<br>8  | ASPG       | AHCY        |  |
| SLCO1<br>C1 | PYCR1       | PLA2G<br>4F  | ACOT8 | NME7       | MTMR6       | ILVBL       | FAAH2       | CYP2C<br>19 | ASPD<br>H  | AFMID       |  |
| SLCO1<br>B1 | PUSL1       | PLA2G<br>4E  | ACOT7 | NME6       | MTMR2       | IL4I1       | FAAH        | CYP2C<br>18 | ASPA       | ADPRH       |  |
| SLC7A<br>8  | PUS3        | PLA2G<br>4D  | ACOT4 | NME5       | MTMR1       | IDH3G       | F13A1       | CYP2B<br>6  | ASNS       | ADORA<br>3  |  |
