# Supplementary figures and images for: Serum metabolomic alterations in multiple myeloma revealed by targeted and untargeted metabolomics approaches: a pilot study
Source: Royal Society of Chemistry journal article supplement (doi:10.1039/c9ra04458b), 2019-01-01

a)

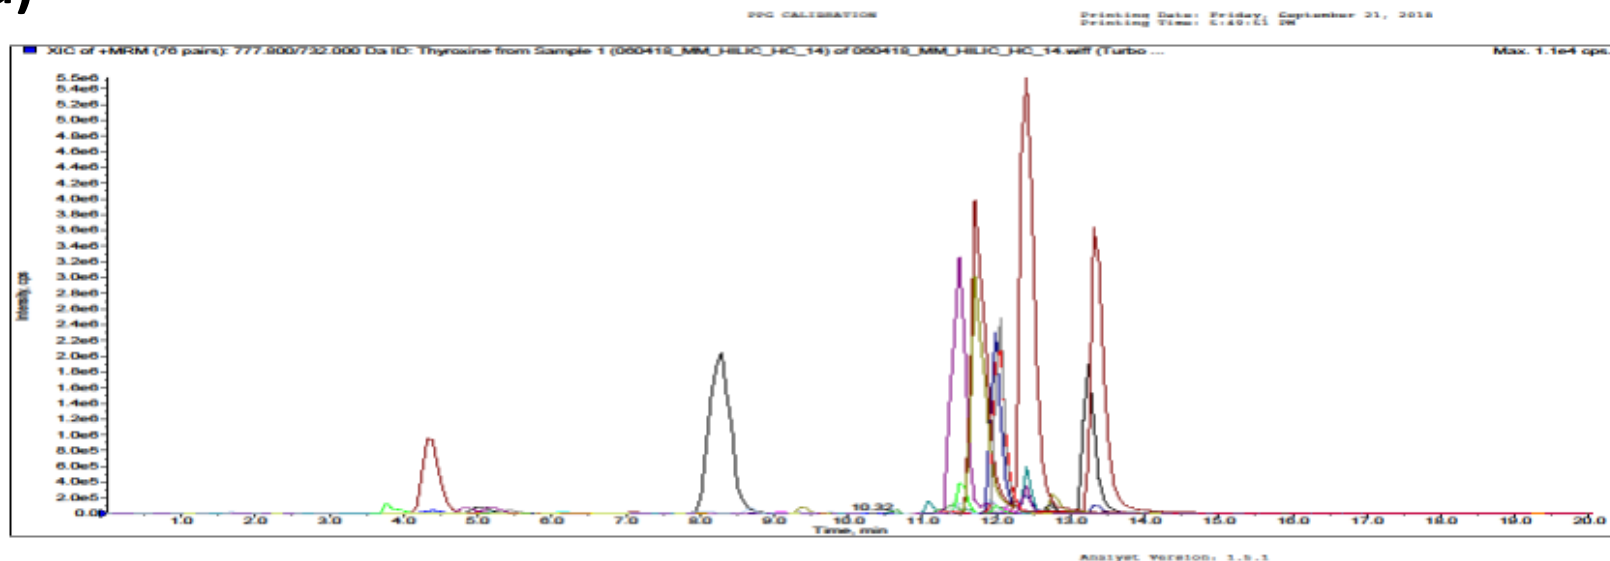

b)

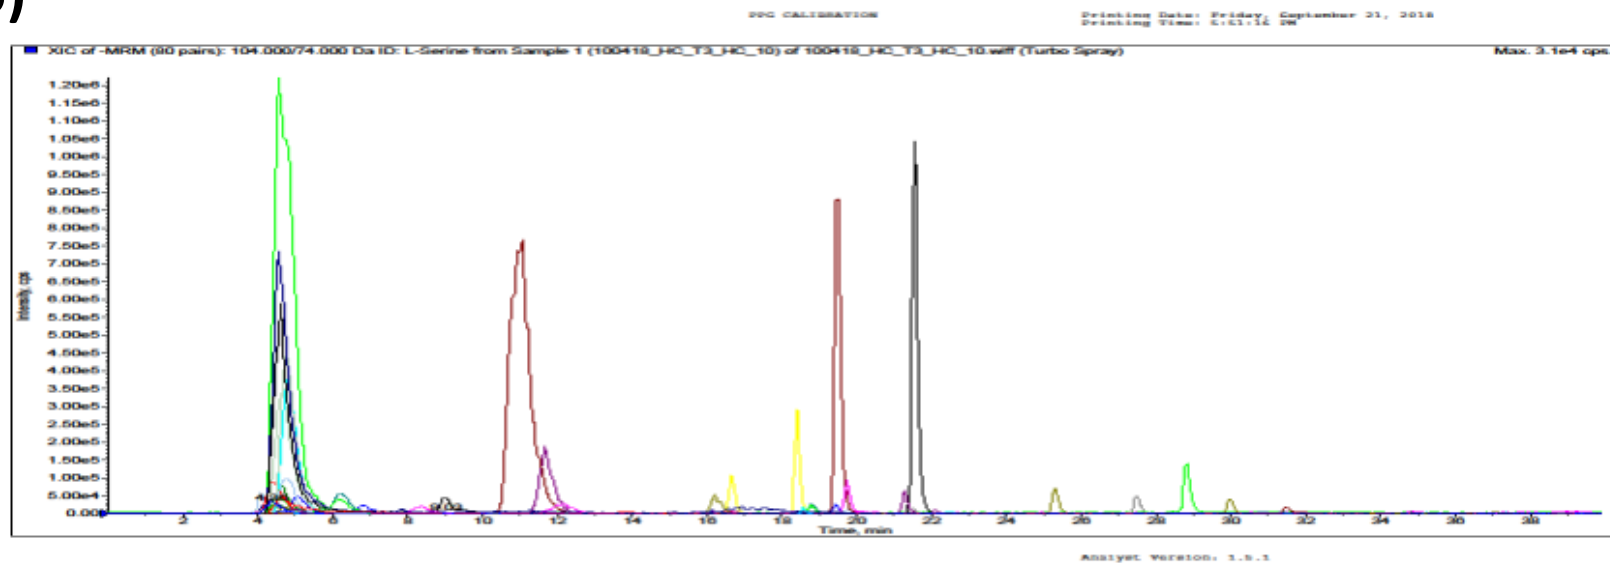

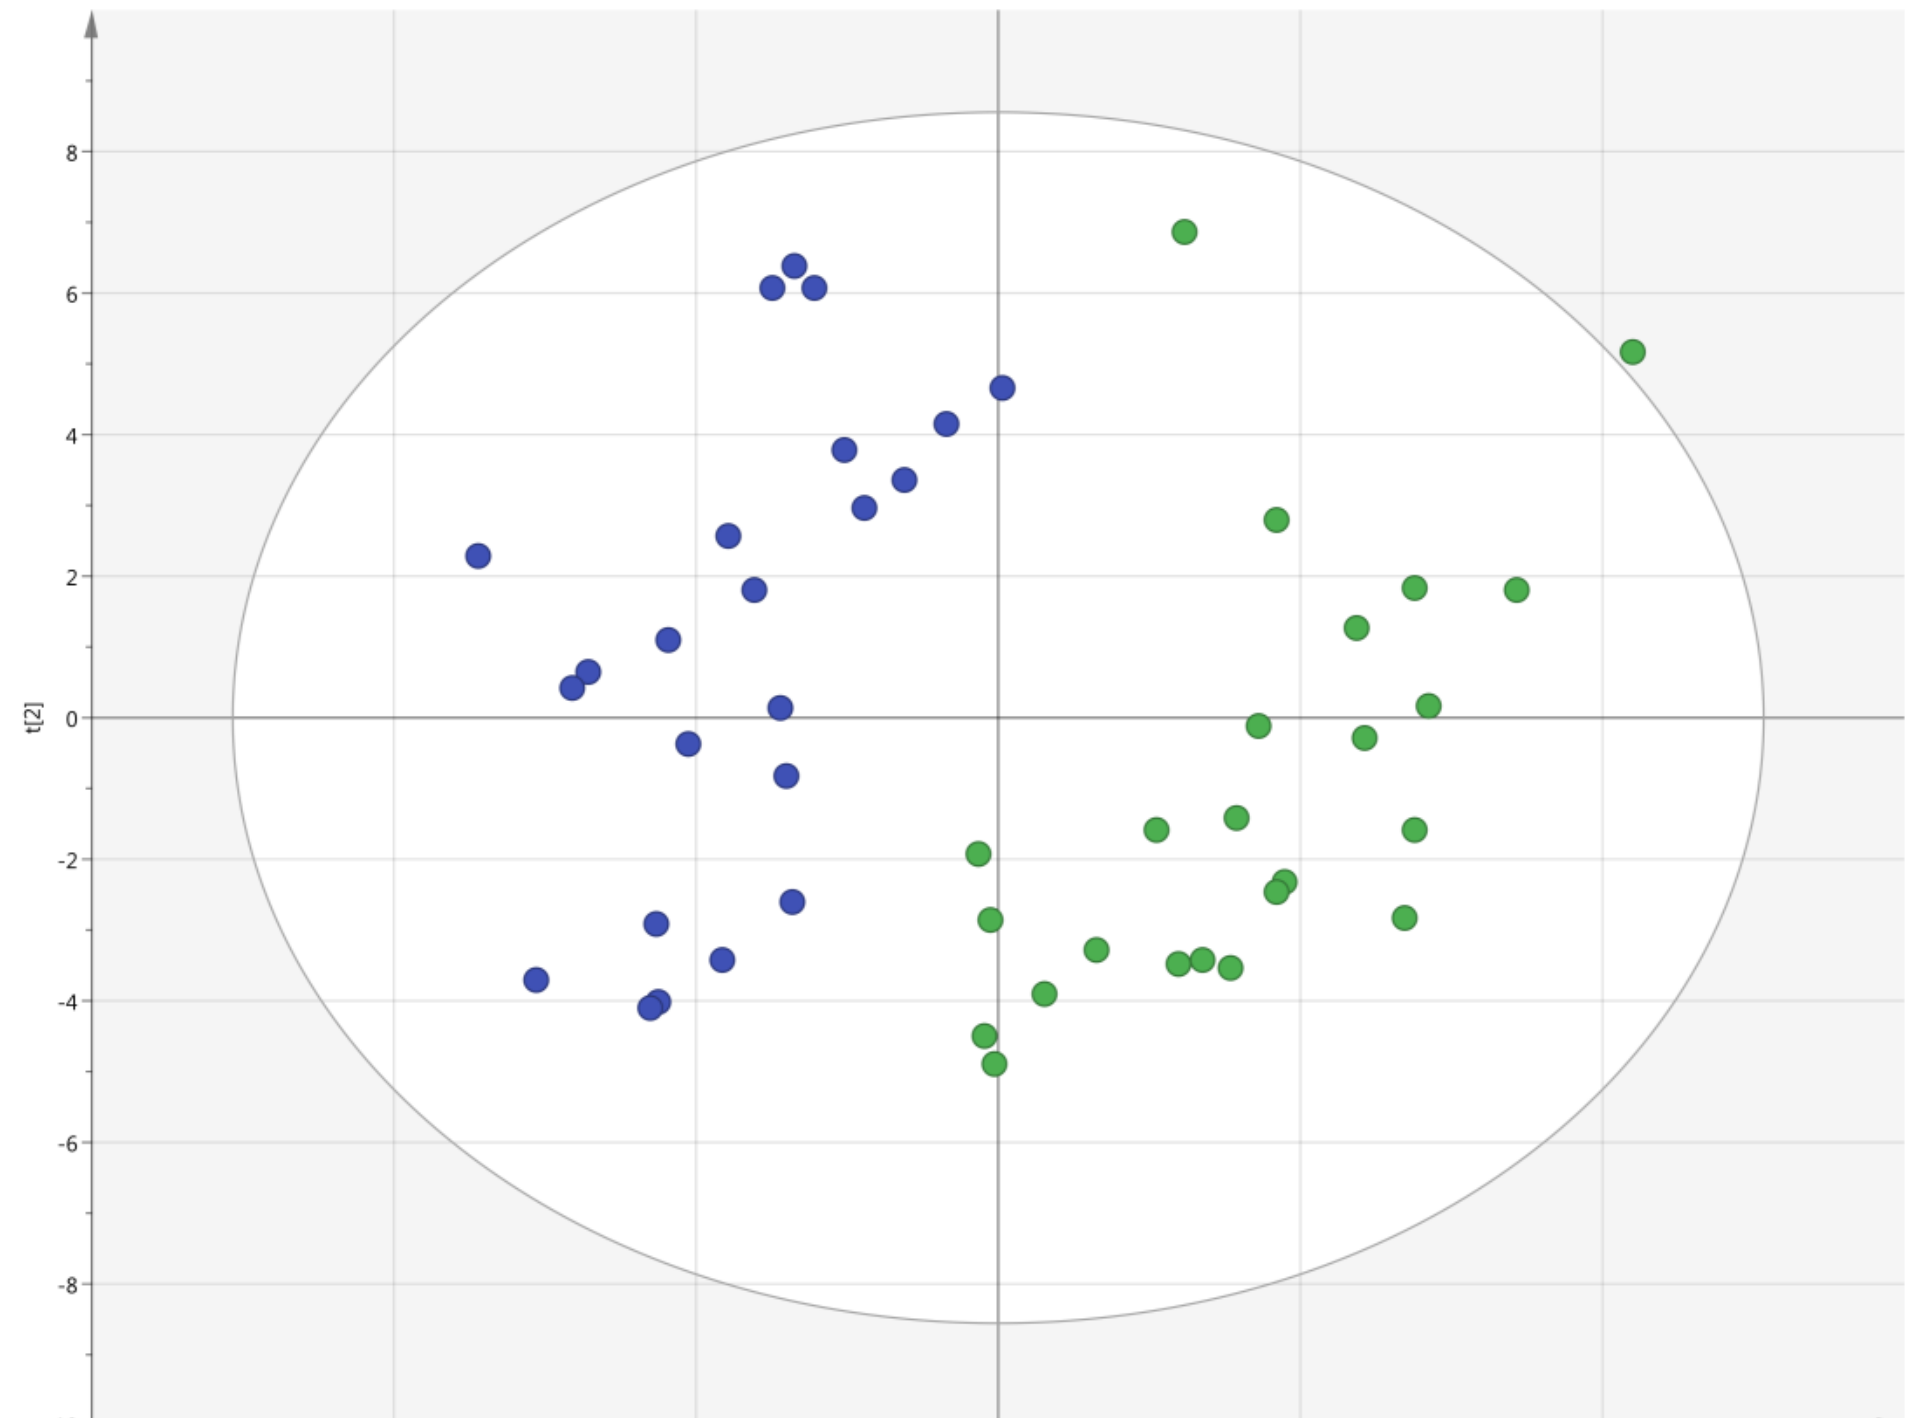

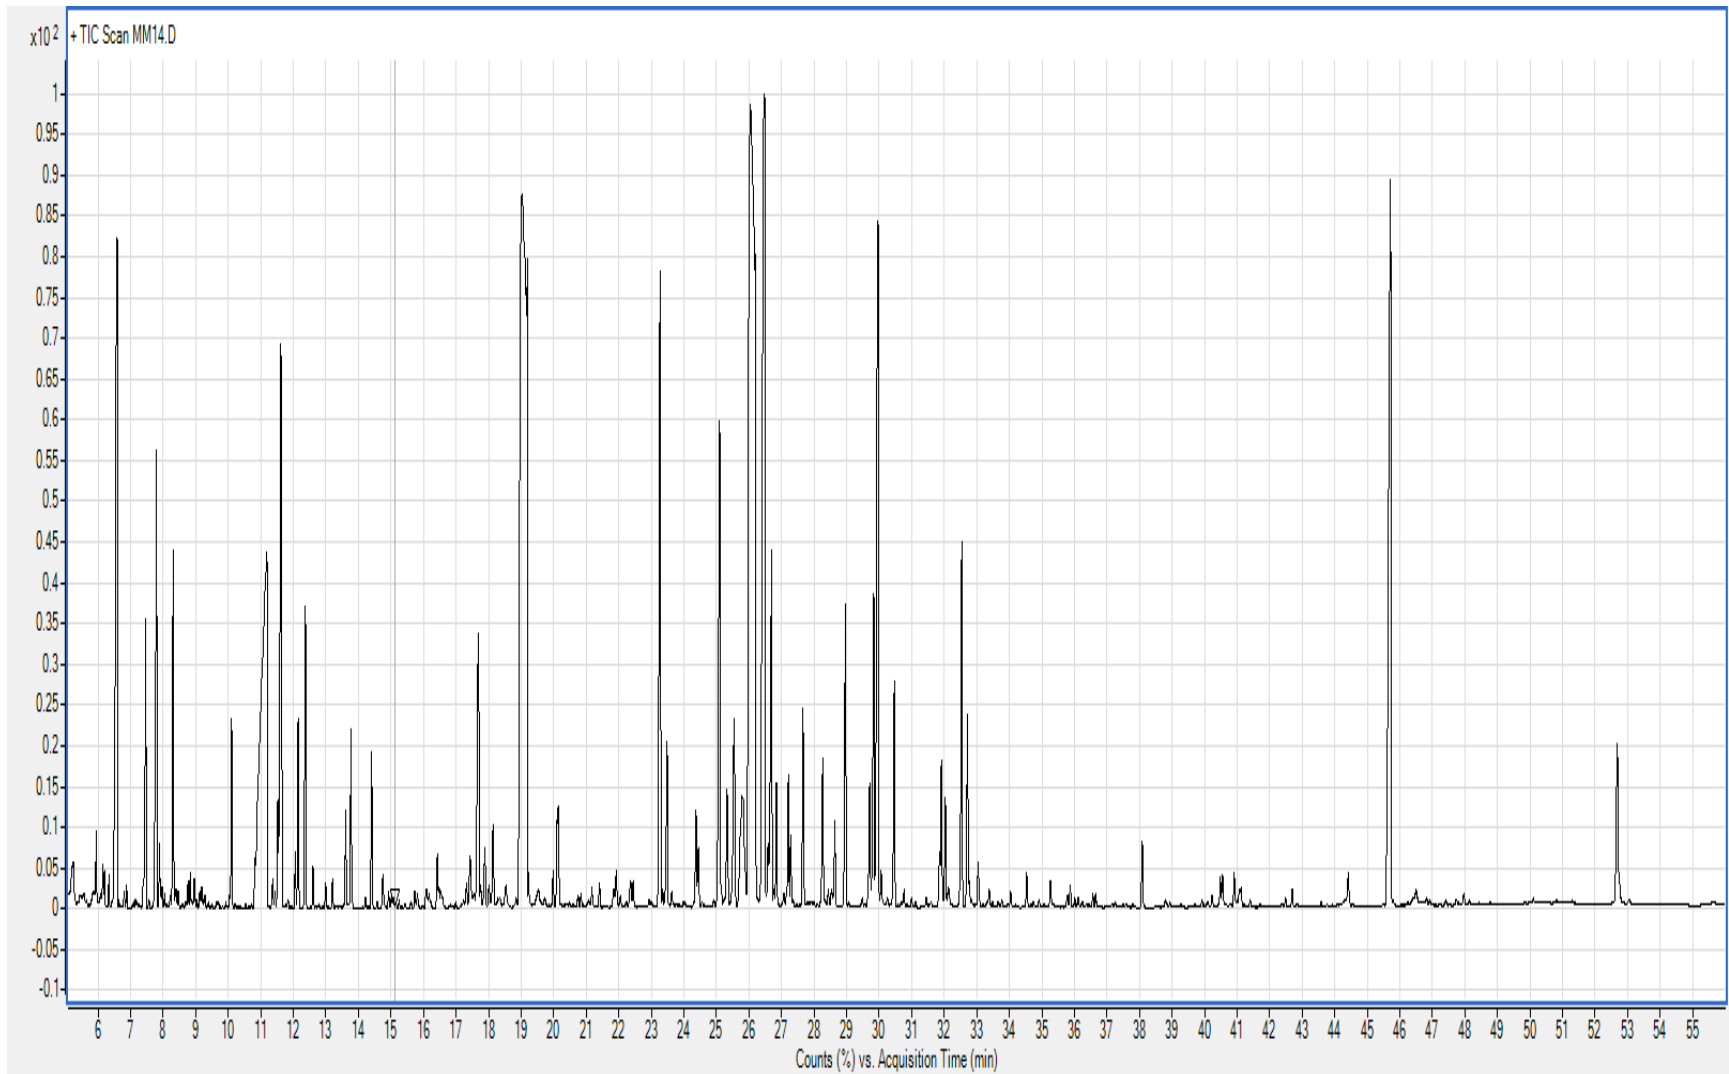

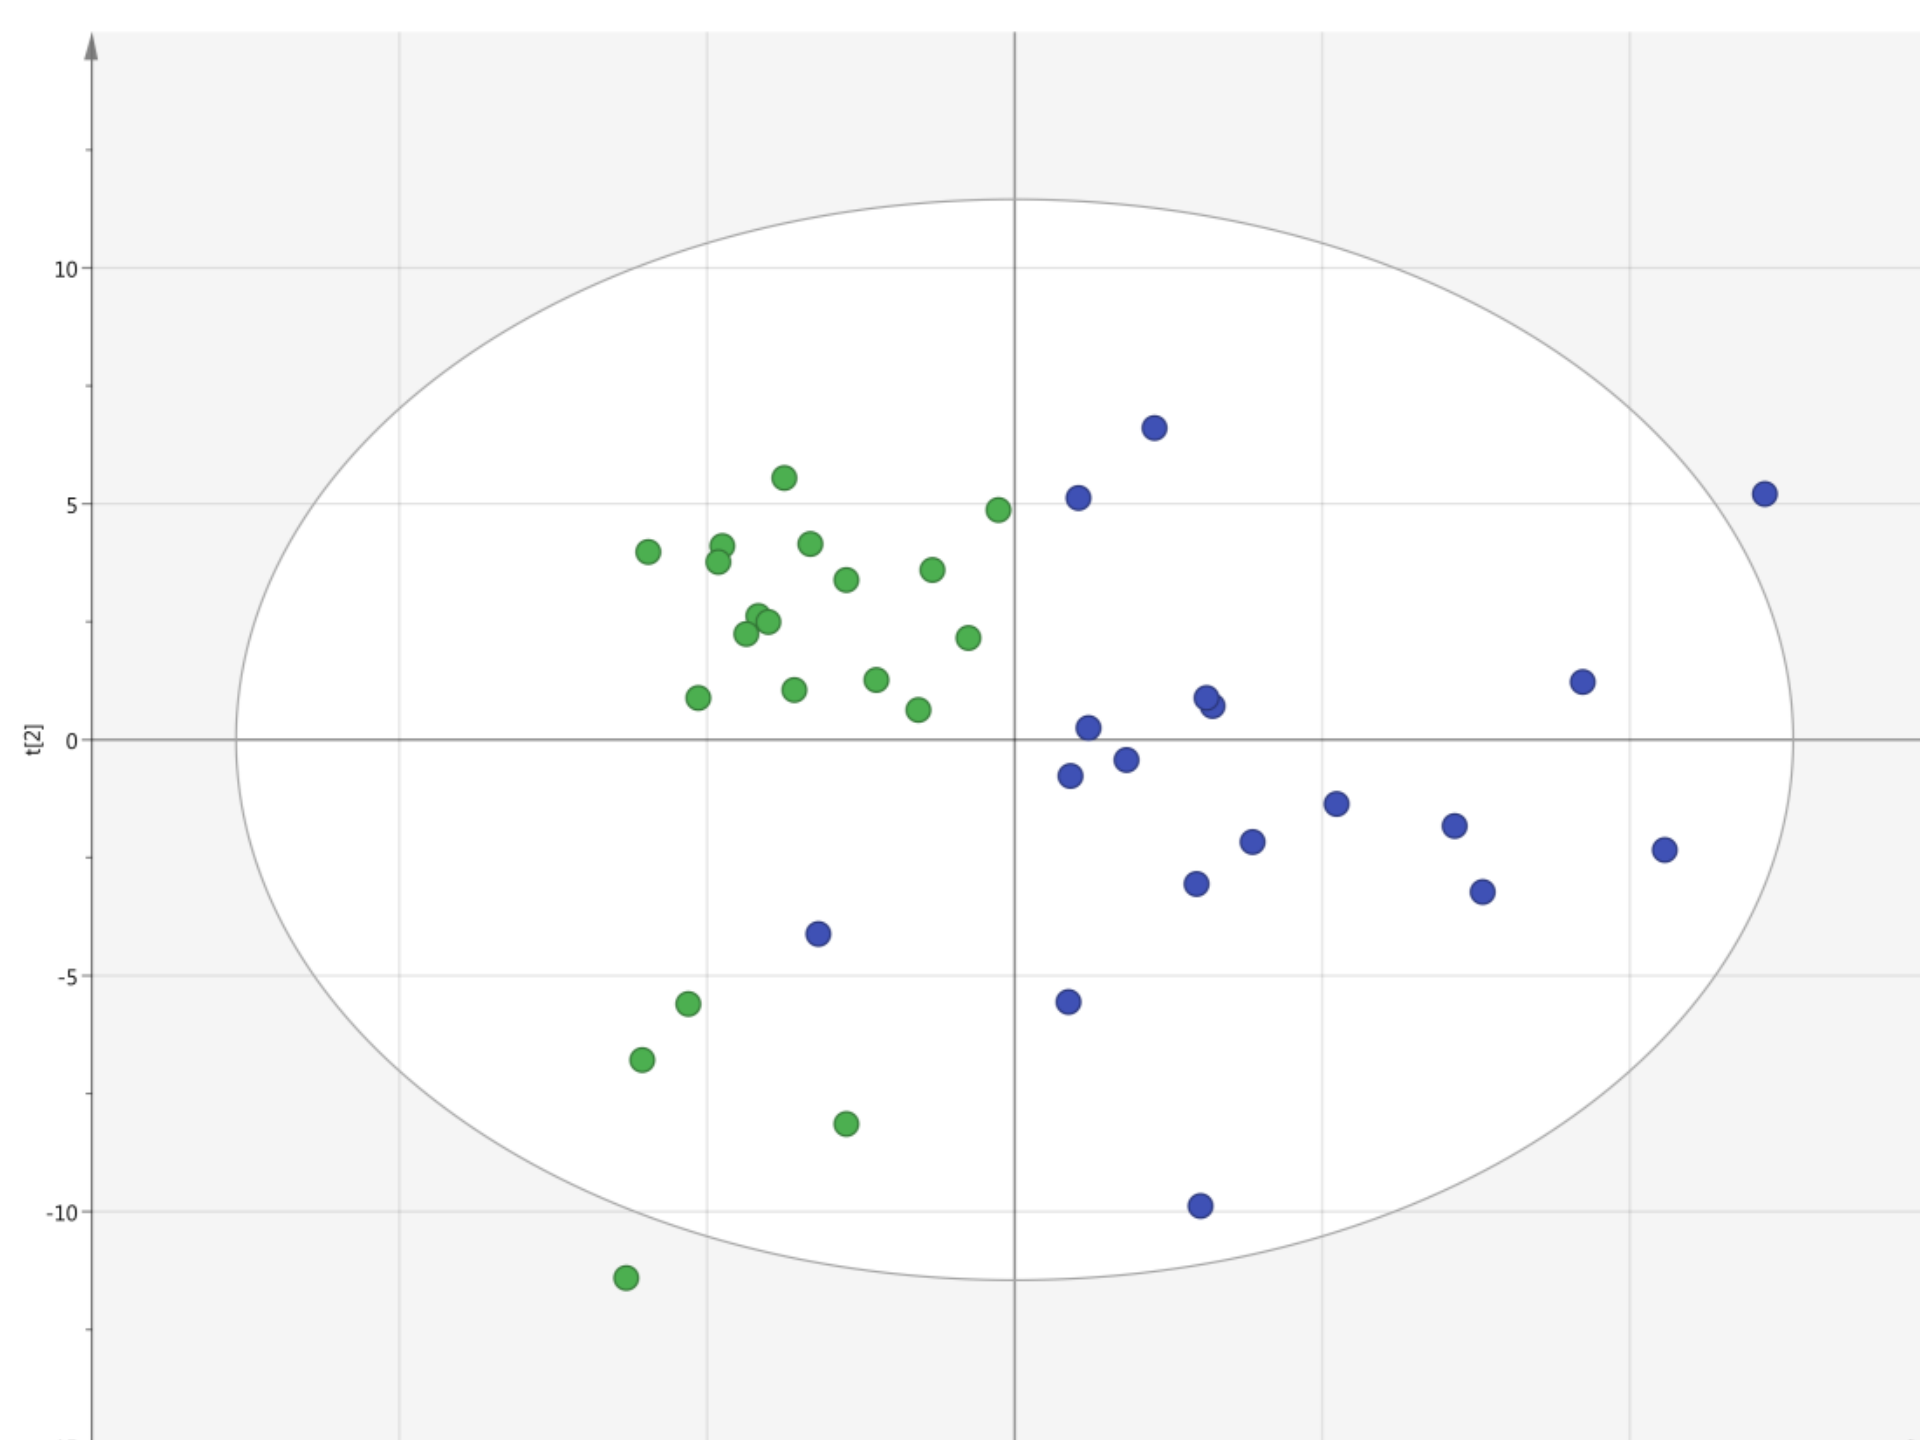

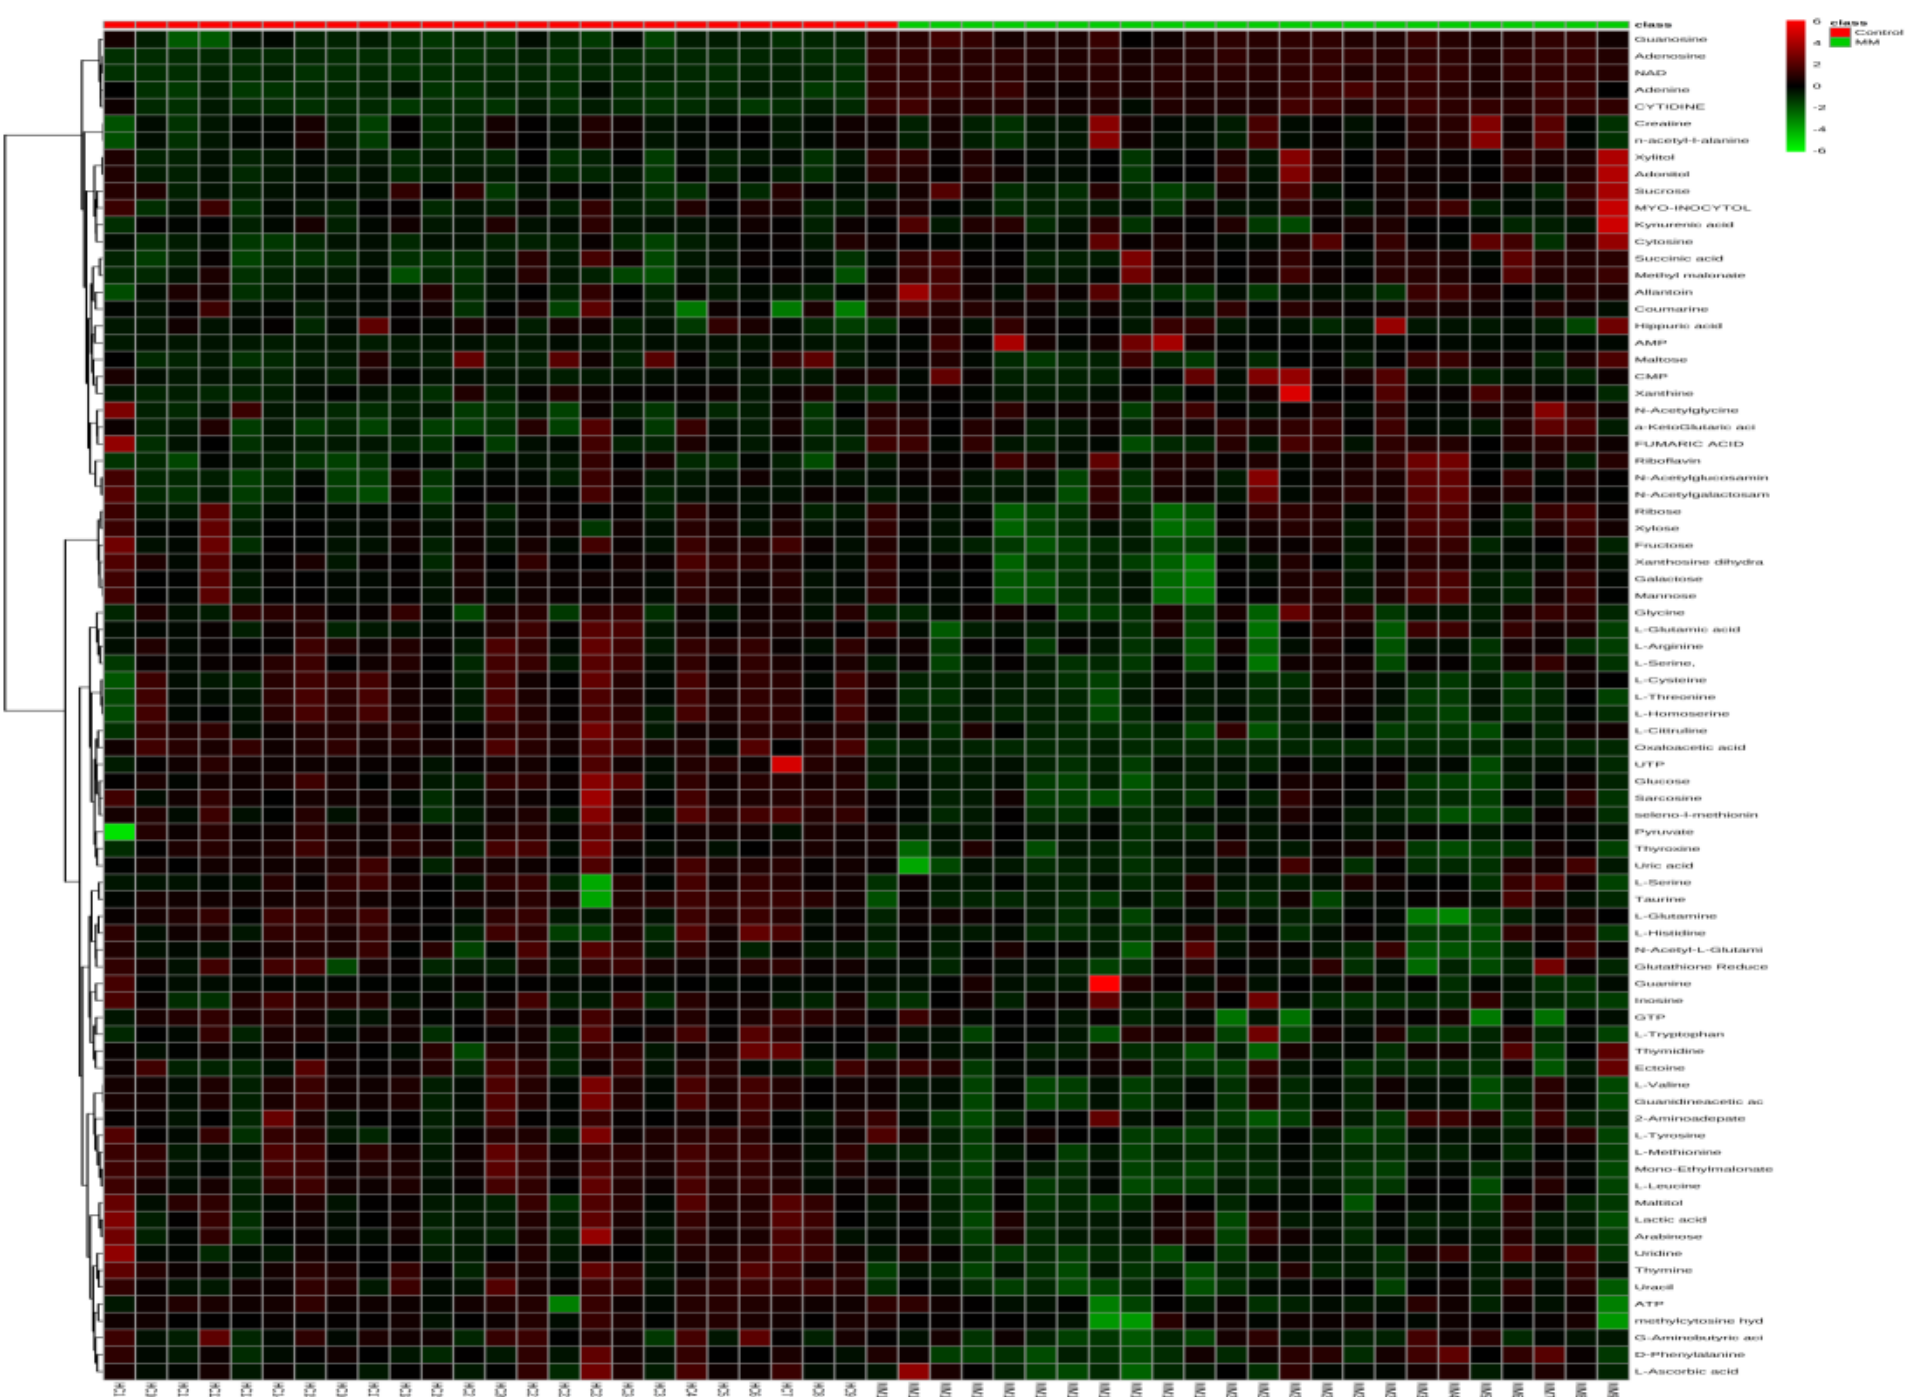

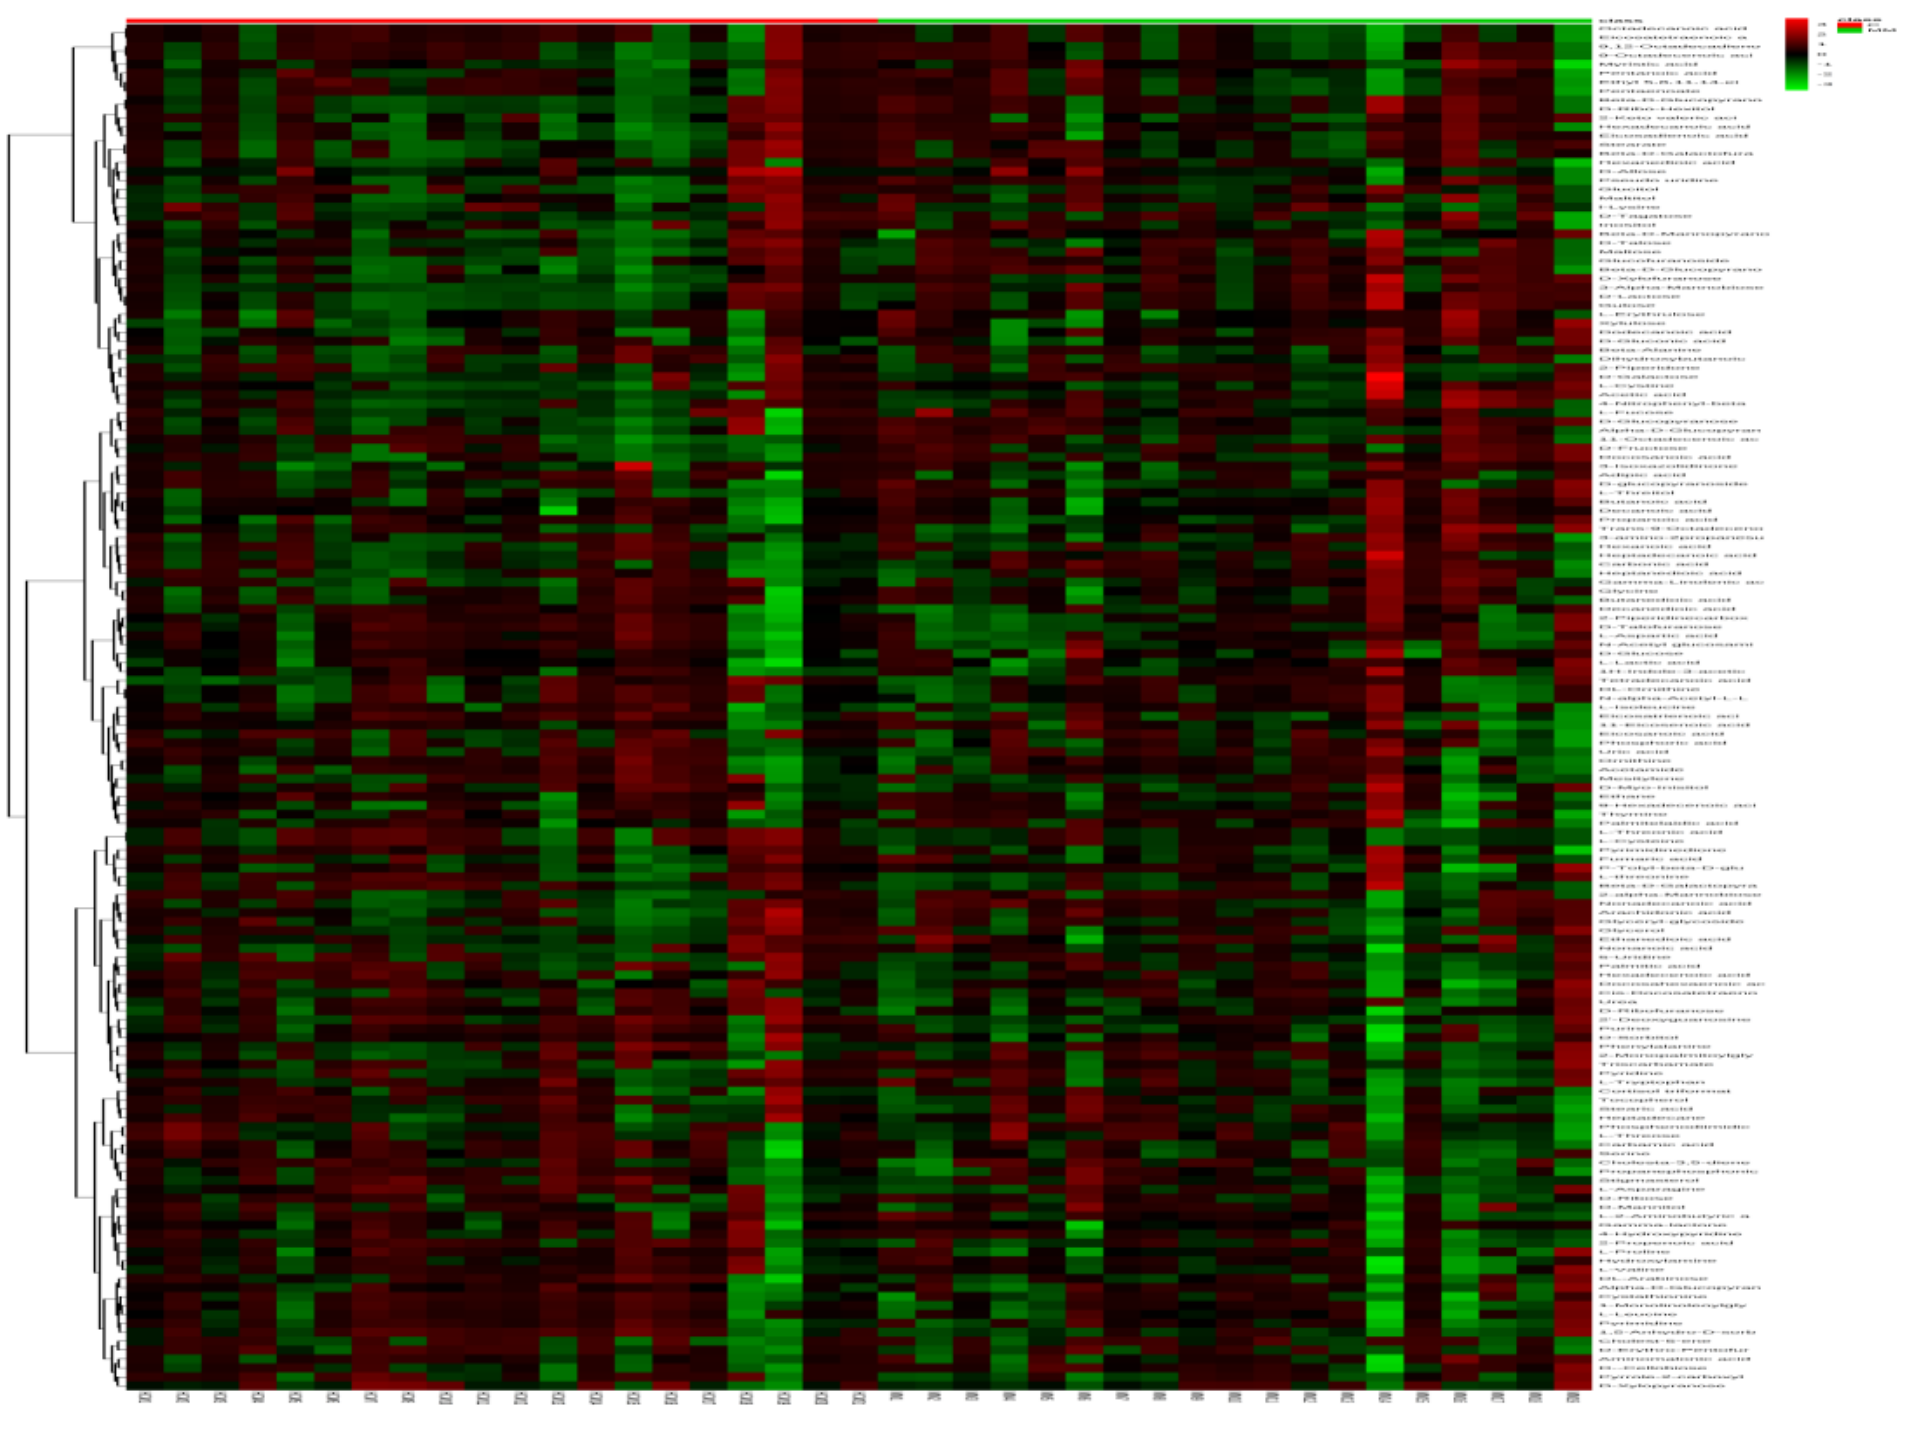

Supplement: c9ra04458b1.pdf [file c9ra04458b1.pdf]
